# Supplementary material for: LncRNA Gm35585 transcriptionally activates the peroxidase EHHADH against diet-induced fatty liver
Source: Springer Nature journal article supplement (doi:10.1038/s12276-025-01420-5), 2025-03-13
Supplement: MOESM1 [file 12276_2025_1420_MOESM1_ESM.pdf]

## Supplementary Figures

### Supplementary Fig. 1

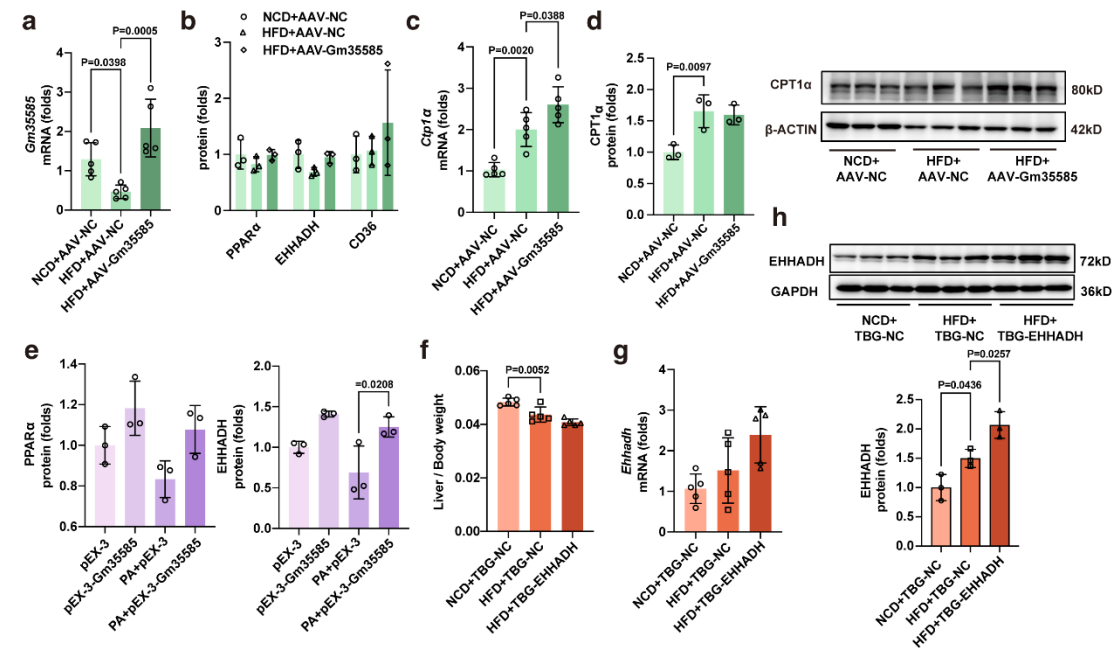

**Supplementary Fig. 1. mRNA and protein expression levels of mice.**

**a** Detection of Gm35585 expression changes in liver tissues by qRT-PCR. Values were normalized to the control group. (mean  $\pm$  SD,  $n = 5$ , One-way ANOVA analysis). **b** Protein expression levels of PPAR $\alpha$ , EHHADH, and CD36. (mean  $\pm$  SD,  $n = 3$ , Two-way ANOVA analysis). **c** *Cpt1 $\alpha$*  mRNA expression level. (mean  $\pm$  SD,  $n = 5$ , One-way ANOVA analysis). **d** CPT1 $\alpha$  protein expression level. (mean  $\pm$  SD,  $n = 3$ , One-way ANOVA analysis). **e** Protein expression levels of PPAR $\alpha$ , EHHADH. (mean  $\pm$  SD,  $n = 3$ , Two-way ANOVA analysis). **f** Liver/body weight factor. (mean  $\pm$  SD,  $n = 5$ , One-way ANOVA analysis). **g** *Ehhadh* mRNA expression level. (mean  $\pm$  SD,  $n = 5$ , One-way ANOVA analysis). **h** EHHADH protein expression level. (mean  $\pm$  SD,  $n = 3$ , One-way ANOVA analysis).

**Supplementary Fig. 2**

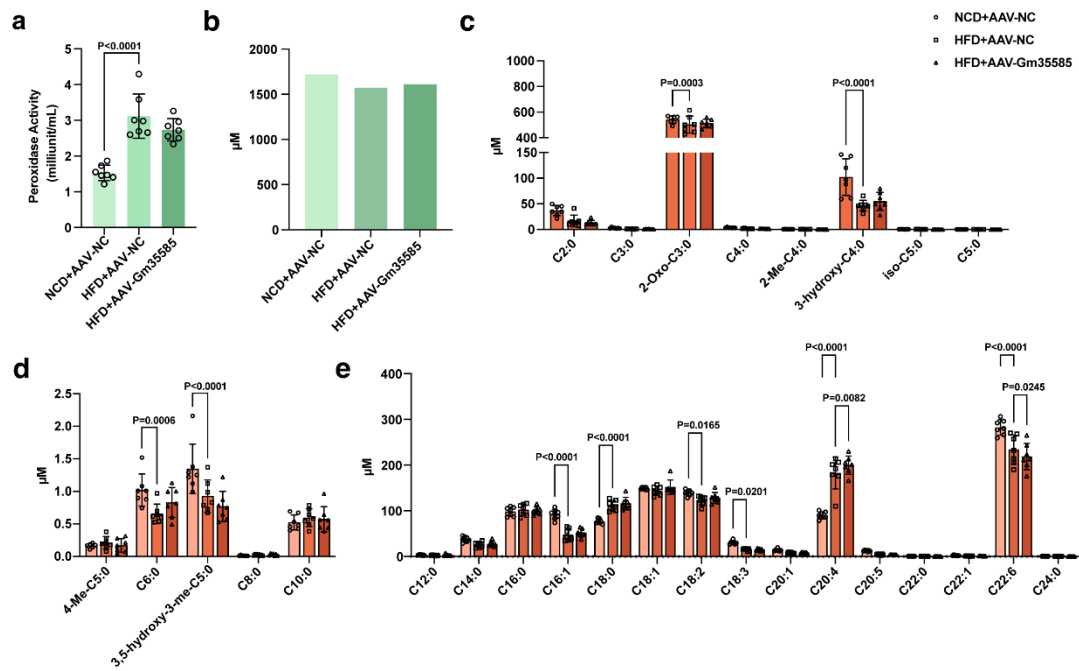

**Supplementary Fig. 2. Serum fatty acids content and peroxidase activity in Gm35585**

**overexpression mice.**

**a** Peroxidase activity. (mean  $\pm$  SD,  $n = 7$ , One-way ANOVA analysis). **b** Total fatty acids contents. **c** SCFAs contents. (mean  $\pm$  SD,  $n = 7$ , Two-way ANOVA analysis). **d** MCFA contents. (mean  $\pm$  SD,  $n = 7$ , Two-way ANOVA analysis). **e** LCFA contents. (mean  $\pm$  SD,  $n = 7$ , Two-way ANOVA analysis).

**Supplementary Fig. 3**

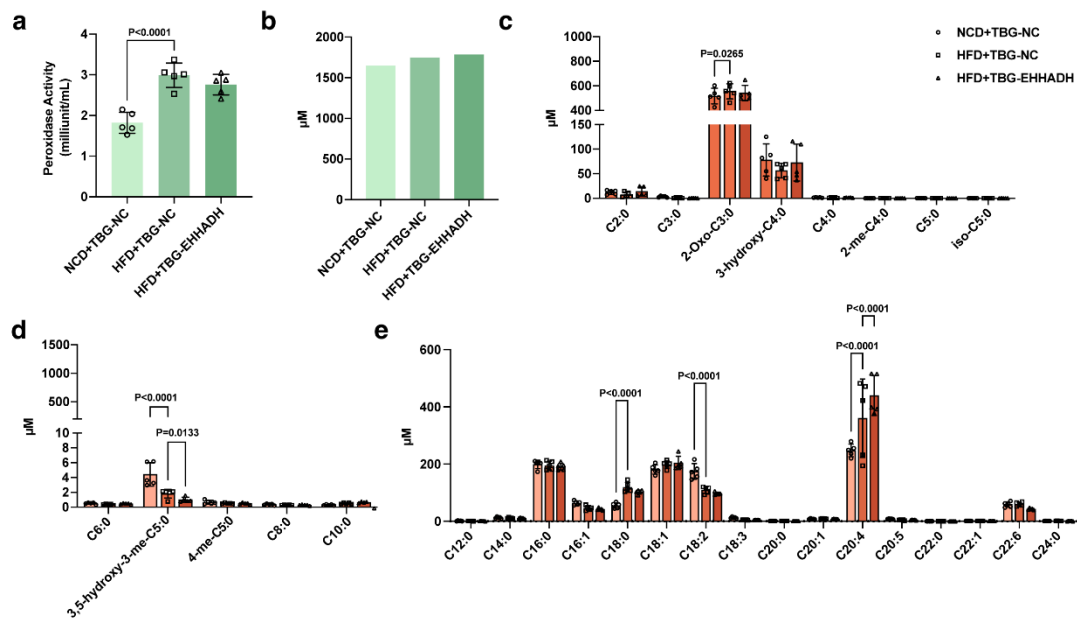

**Supplementary Fig. 3. Serum fatty acids content and peroxidase activity in EHHADH overexpression mice.**

**a** Peroxidase activity. (mean  $\pm$  SD,  $n = 5$ , One-way ANOVA analysis). **b** Total fatty acids contents. **c** SCFAs contents. (mean  $\pm$  SD,  $n = 5$ , Two-way ANOVA analysis). **d** MCFAs contents. (mean  $\pm$  SD,  $n = 5$ , Two-way ANOVA analysis). **e** LCFAs contents. (mean  $\pm$  SD,  $n = 5$ , Two-way ANOVA analysis).

**Supplementary Fig. 4**

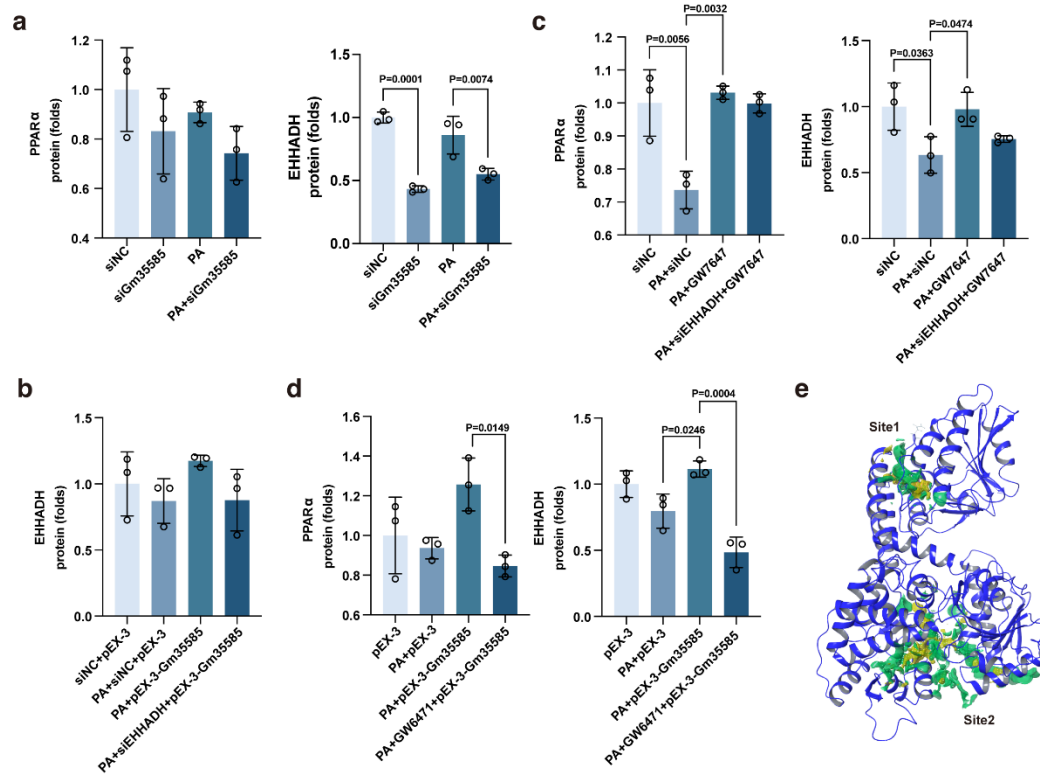

**Supplementary Fig. 4. Protein expression levels of PPARα and EHHADH *in vitro* assay.**

**a** Protein expression levels of PPARα and EHHADH under PA, siGm35585 administration. Values were normalized to control group. (mean ± SD,  $n = 3$ , One-way ANOVA analysis). **b** Protein expression levels of EHHADH under PA, siEHHADH, pEX-3-Gm35585 administration. Values were normalized to control group. (mean ± SD,  $n = 3$ , One-way ANOVA analysis). **c** Protein expression of PPARα and EHHADH under PA, siEHHADH and GW7647 condition. Values were normalized to control group. (mean ± SD,  $n = 3$ , One-way ANOVA analysis). **d** Protein expression of PPARα and EHHADH under PA, GW6471 and pEX-3-Gm35585 administration. Values were normalized to control group. (mean ± SD,  $n = 3$ , One-way ANOVA analysis). **e** Virtual molecular docking of EHHADH crystal structure.

## Supplementary Fig. 5

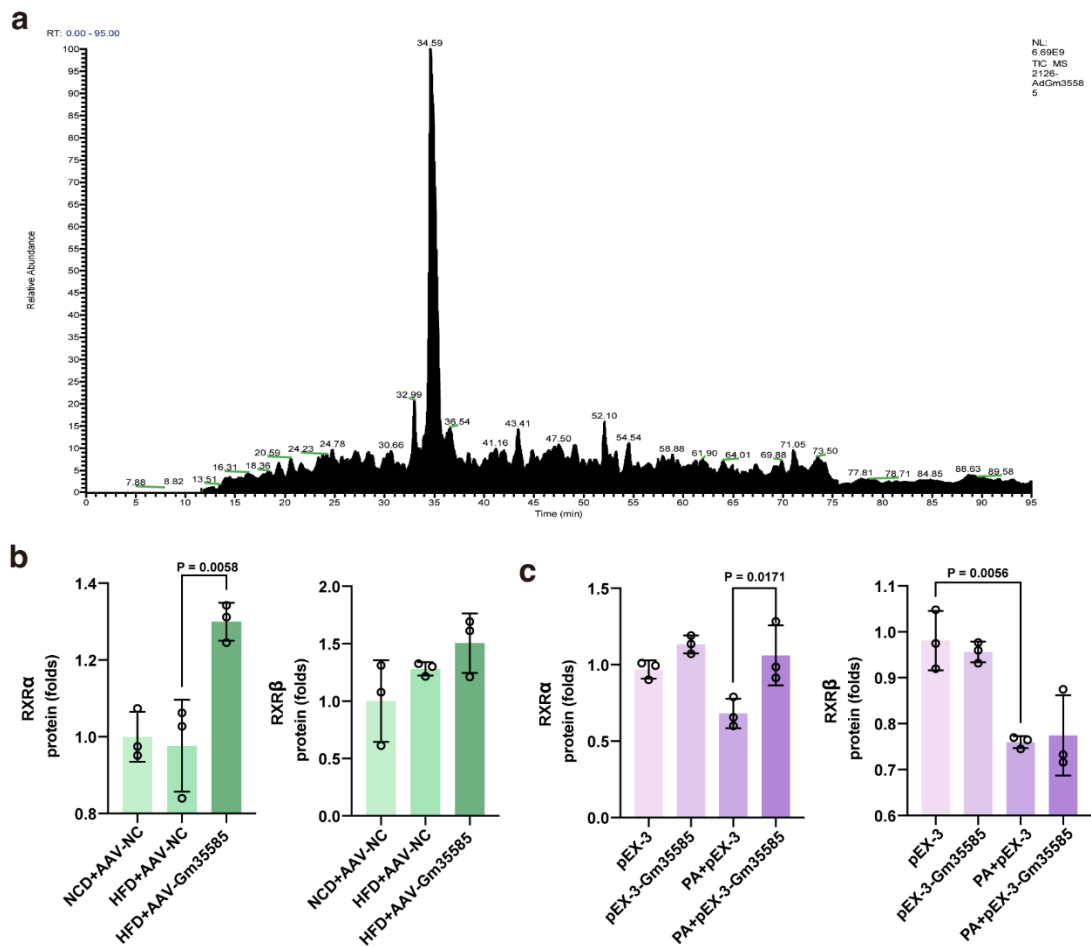

**Supplementary Fig. 5. Protein spectrum ion peak diagram of RNA pulldown and protein expression of RXRα and RXRβ.**

**a** Protein spectrum ion peak diagram of RNA pulldown. **b** Protein expression of RXRα and RXRβ *in vivo*. Values were normalized to control group. (mean  $\pm$  SD,  $n = 3$ , One-way ANOVA analysis). **c** Protein expression of RXRα and RXRβ *in vitro*. Values were normalized to control group. (mean  $\pm$  SD,  $n = 3$ , One-way ANOVA analysis).

**Supplementary Fig. 6**

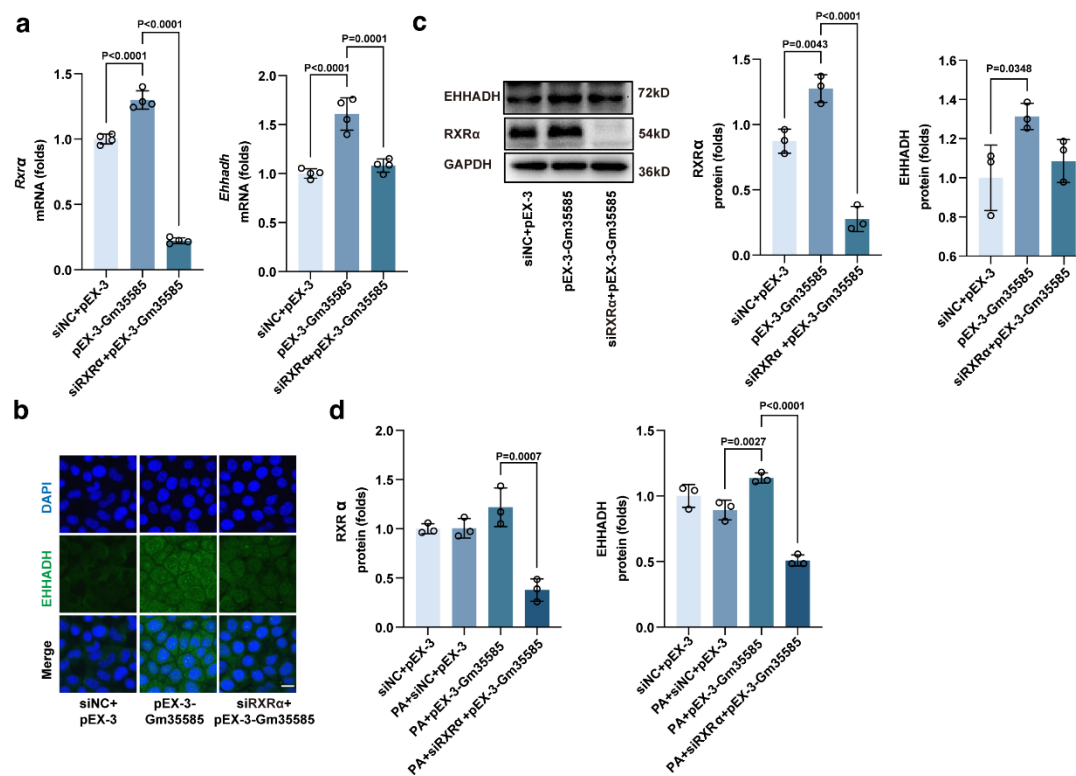

**Supplementary Fig. 6. The effect of RXRα silence on EHHADH.**

**a** Under siRXRα and Gm35585 overexpression condition, mRNA expression of *Rxra* and *Ehhadh*. Values were normalized to control group. (mean ± SD,  $n = 4$ , One-way ANOVA analysis). **b** EHHADH immunofluorescence staining after siRXRα and pEX-3-Gm35585 administration. Scale bar, 25 μm. **c** Protein expression of RXRα and EHHADH. Values were normalized to control group. (mean ± SD,  $n = 3$ , One-way ANOVA analysis). **d** Protein expression of RXRα and EHHADH *in vitro*. Values were normalized to control group. (mean ± SD,  $n = 3$ , One-way ANOVA analysis).
